# Supplementary material for: Dietary Fibre Intake in Australia. Paper II: Comparative Examination of Food Sources of Fibre among High and Low Fibre Consumers
Source: PubMed Central journal article supplement (PMC6163727; doi:10.3390/nu10091223), 2018-09-04
Supplement: nutrients-10-01223-s001.pdf [file nutrients-10-01223-s001.pdf]

**Supplementary Table 1.** Daily nutrient intakes by quartile of dietary fiber intake.

| Nutrient          | Children.<br>(2–18 years)                           |                         |                         |                               |                | Adults.<br>(19+ years)                              |                          |                         |                               |                |
|-------------------|-----------------------------------------------------|-------------------------|-------------------------|-------------------------------|----------------|-----------------------------------------------------|--------------------------|-------------------------|-------------------------------|----------------|
|                   | Low Fiber<br>Consumer.<br>Q1                        | Q2                      | Q3                      | High Fiber<br>Consumer.<br>Q4 | <i>p</i> value | Low Fiber<br>Consumer.<br>Q1                        | Q2                       | Q3                      | High Fiber<br>Consumer.<br>Q4 | <i>p</i> value |
|                   | Energy-adjusted nutrient intake, marginal mean (SE) |                         |                         |                               |                | Energy-adjusted nutrient intake, marginal mean (SE) |                          |                         |                               |                |
| Protein (g)       | 76.3 (0.9)                                          | 74.6 (0.9)              | 74.8 (0.9)              | 74.1 (0.9)                    | 0.439          | 90.1 (0.7)                                          | 91.1 (0.6)               | 91.9 (0.6)              | 90.6 (0.7)                    | 0.243          |
| Total fat (g)     | 76.4 <sup>a</sup> (0.6)                             | 73.0 <sup>b</sup> (0.6) | 66.5 <sup>c</sup> (0.6) | 60.1 <sup>d</sup> (0.7)       | <0.001         | 77.8 <sup>a</sup> (0.5)                             | 75.3 <sup>ab</sup> (0.5) | 73.5 <sup>b</sup> (0.5) | 68 <sup>c</sup> (0.5)         | <0.001         |
| Saturated Fat (g) | 33.0 <sup>a</sup> (0.4)                             | 31.5 <sup>a</sup> (0.3) | 27.7 <sup>b</sup> (0.3) | 23.8 <sup>c</sup> (0.4)       | <0.001         | 31.0 <sup>a</sup> (0.2)                             | 29.1 <sup>b</sup> (0.2)  | 27.6 <sup>c</sup> (0.2) | 22.7 <sup>d</sup> (0.2)       | <0.001         |
| Carbohydrates (g) | 226 <sup>a</sup> (2)                                | 232 <sup>a</sup> (2)    | 243 <sup>b</sup> (2)    | 253 <sup>c</sup> (2)          | <0.001         | 206 <sup>a</sup> (1)                                | 219 <sup>b</sup> (1)     | 227 <sup>c</sup> (1)    | 250 <sup>d</sup> (1)          | <0.001         |
| Total sugars (g)  | 116 (1.7)                                           | 109 (1.6)               | 113 (1.6)               | 110 (1.8)                     | 0.009          | 101 (1)                                             | 101 (1)                  | 101 (1)                 | 107 (1)                       | 0.001          |
| Added sugars (g)  | 77.3 <sup>a</sup> (1.5)                             | 62.8 <sup>b</sup> (1.4) | 53.6 <sup>c</sup> (1.4) | 37.4 <sup>d</sup> (1.5)       | <0.001         | 68.2 <sup>a</sup> (1.0)                             | 57.0 <sup>b</sup> (0.9)  | 45.8 <sup>c</sup> (0.9) | 30.3 <sup>d</sup> (1.0)       | <0.001         |
| Free sugars (g)   | 84.7 <sup>a</sup> (1.6)                             | 69.9 <sup>b</sup> (1.4) | 62.6 <sup>b</sup> (1.5) | 46.9 <sup>c</sup> (1.6)       | <0.001         | 74.2 <sup>a</sup> (1.0)                             | 63.6 <sup>b</sup> (1.0)  | 53.3 <sup>c</sup> (1.0) | 39.2 <sup>d</sup> (1.0)       | <0.001         |
| Sodium (mg)       | 2363 (36)                                           | 2369 (33)               | 2222 (34)               | 2312 (37)                     | 0.009          | 2397 (25)                                           | 2465 (24)                | 2479 (24)               | 2359 (25)                     | 0.001          |
| Calcium (mg)      | 782 (16)                                            | 797 (15)                | 804 (15)                | 828 (16)                      | 0.305          | 726 <sup>a</sup> (9)                                | 781 <sup>b</sup> (8)     | 819 <sup>b</sup> (8)    | 879 <sup>c</sup> (9)          | <0.001         |
| Iron (mg)         | 8.0 <sup>a</sup> (0.2)                              | 8.9 <sup>b</sup> (0.1)  | 9.8 <sup>c</sup> (0.1)  | 12.1 <sup>d</sup> (0.2)       | <0.001         | 8.6 <sup>a</sup> (0.1)                              | 9.8 <sup>b</sup> (0.1)   | 11.5 <sup>c</sup> (0.1) | 14.6 <sup>d</sup> (0.1)       | <0.001         |
| Thiamin (mg)      | 1.2 <sup>a</sup> (0.0)                              | 1.6 <sup>b</sup> (0.0)  | 1.6 <sup>b</sup> (0.0)  | 2.1 <sup>c</sup> (0.0)        | <0.001         | 1.2 <sup>a</sup> (0.0)                              | 1.4 <sup>b</sup> (0.0)   | 1.6 <sup>c</sup> (0.0)  | 2.0 <sup>d</sup> (0.0)        | <0.001         |
| Riboflavin (mg)   | 1.7 <sup>a</sup> (0.0)                              | 1.9 <sup>ab</sup> (0.0) | 1.8 <sup>ab</sup> (0.0) | 2.0 <sup>b</sup> (0.0)        | <0.001         | 1.7 <sup>a</sup> (0.0)                              | 1.8 <sup>ab</sup> (0.0)  | 1.9 <sup>b</sup> (0.0)  | 2.1 <sup>c</sup> (0.0)        | <0.001         |
| Niacin (mg)       | 32.8 (0.5)                                          | 33.7 (0.5)              | 33.2 (0.5)              | 34.5 (0.5)                    | 0.111          | 40.6 (0.3)                                          | 41.4 (0.3)               | 41.5 (0.3)              | 41.7 (0.4)                    | 0.112          |
| Folate (µg)       | 497 <sup>a</sup> (13)                               | 620 <sup>b</sup> (12)   | 642 <sup>b</sup> (12)   | 746 <sup>c</sup> (13)         | <0.001         | 469 <sup>a</sup> (7)                                | 564 <sup>b</sup> (7)     | 624 <sup>c</sup> (7)    | 775 <sup>d</sup> (7)          | <0.001         |
| Magnesium (mg)    | 211 <sup>a</sup> (2)                                | 235 <sup>b</sup> (2)    | 264 <sup>c</sup> (2)    | 309 <sup>d</sup> (2)          | <0.001         | 273 <sup>a</sup> (2)                                | 309 <sup>b</sup> (2)     | 345 <sup>c</sup> (2)    | 426 <sup>d</sup> (2)          | <0.001         |
| Potassium (mg)    | 2052 <sup>a</sup> (28)                              | 2198 <sup>b</sup> (25)  | 2516 <sup>c</sup> (26)  | 2811 <sup>d</sup> (28)        | <0.001         | 2304 <sup>a</sup> (18)                              | 2637 <sup>b</sup> (17)   | 3006 <sup>c</sup> (17)  | 3680 <sup>d</sup> (18)        | <0.001         |

Abbreviations: Q, quartile; SE, standard error. Different superscripts a, b, c, d denotes significant difference between groups ( $p < 0.001$ ).
